# Supplementary material
Source: Springer Nature journal article supplement (https://www.springermedizin.de/resource/supplementary/12936_2012_2161_MOESM3_ESM.pdf/9542836)

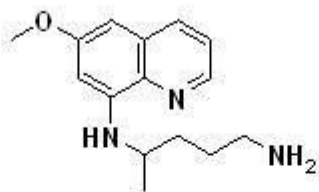

MAO-A

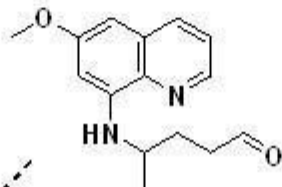

HCOOH

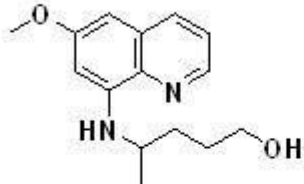

HCOOH

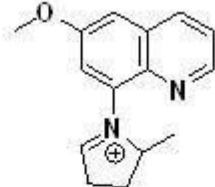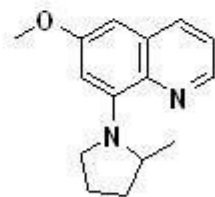

Supplement: MOESM3 [file 9542836]
